# Supplementary material
Source: Springer Nature journal article supplement (https://www.springermedizin.de/resource/supplementary/12889_2012_5358_MOESM1_ESM.pdf/9495048)
Supplement: MOESM1 [file 9495048]

**Ask**  
Screening for SNAPW risk factors as part of the routine assessment process

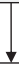

**Assess**  
Assessment of clients' readiness to change

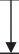

**Advise**  
Provide feedback on SNAPW risk factors and brief stage-matched counselling for lifestyle change over at least two visits

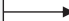

| <b>Stage-matched assistance for lifestyle change</b> |                                   |
|------------------------------------------------------|-----------------------------------|
| <b>Stage</b>                                         | <b>Approach</b>                   |
| <i>Pre-contemplation/</i>                            | Brief advice                      |
| <i>Contemplation</i>                                 | brief motivational interviewing   |
| <i>Preparation/action</i>                            | goal setting /action planning     |
| <i>Maintenance</i>                                   | reinforcement, relapse prevention |
| <i>Relapse</i>                                       | relapse management                |

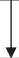

**Assist**  
Refer to support services for more intensive intervention (especially high risk clients)

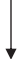

**Arrange**  
Follow up progress at subsequent visits
